# Supplementary material for: Re-Visiting Antioxidant Therapy in Murine Advanced Atherosclerosis with Brussels Chicory, a Typical Vegetable in Mediterranean Diets
Source: MDPI journal article supplement (doi:10.3390/nu15040832), 2023-02-06
Supplement: s1 [file s1]

## Supplementary Information

**Table S1.** Composition of the experimental diets and freeze-dried Brussels chicory.

|                                     | AIN-93G diet | Chicory-supplemented diet |
|-------------------------------------|--------------|---------------------------|
| Ingredient (g/kg)                   |              |                           |
| Freeze-dried Brussels chicory       | 0            | 5                         |
| protein                             |              | 0.981                     |
| fat                                 |              | 0.155                     |
| carbohydrate                        |              | 2.280                     |
| crude fiber                         |              | 0.923                     |
| moisture                            |              | 0.087                     |
| Phenolic acids                      |              |                           |
| protocatechuic acid                 |              | 0.029                     |
| gallic acid                         |              | 0.028                     |
| caffeic acid                        |              | 0.003                     |
| 5-caffeoylquinic acid               |              | 0.128                     |
| caftaric acid                       |              | 0.020                     |
| chicoric acid                       |              | 0.049                     |
| Sesquiterpene lactones              |              |                           |
| lactucin                            |              | 0.001                     |
| 11 $\beta$ ,13-dihydrolactucin      |              | 0.005                     |
| lactucopicrin                       |              | 0.007                     |
| 11 $\beta$ ,13-dihydrolactucopicrin |              | 0.0005                    |
| Casein                              | 200          | 199.019                   |
| Corn starch                         | 397.486      | 395.206                   |
| Maltodextrin                        | 132          | 132                       |
| Sucrose                             | 100          | 100                       |
| Soybean oil                         | 70           | 69.845                    |
| Cellulose                           | 50           | 49.077                    |
| AIN-93G mineral mix                 | 35           | 35                        |
| AIN-93G vitamin mix                 | 10           | 10                        |
| L-cystine                           | 3            | 3                         |
| Choline bitartrate                  | 2.5          | 2.5                       |
| Tert-butylhydroquinone              | 0.014        | 0.014                     |

**Table S2. Primers for qRT-PCR.**

| Genes                | Primer sequences        |
|----------------------|-------------------------|
| <i>Nox1</i> -Forward | GGTTGGGGCTGAACATTTTTC   |
| <i>Nox1</i> -Reverse | TCGACACACAGGAATCAGGAT   |
| <i>Nox2</i> -Forward | CCTTTGGTACAGCCAGTGAAGA  |
| <i>Nox2</i> -Reverse | CAATCCCGGCTCCCACTAACATC |
| <i>Nox4</i> -Forward | GAAGGGGTAAACACCTCTGC    |
| <i>Nox4</i> -Reverse | ATGCTCTGCTTAAACACAATCCT |
| <i>eNOS</i> -Forward | GGCTGGGTTTAGGGCTGTG     |
| <i>eNOS</i> -Reverse | CTGAGGGTGTCGTAGGTGATG   |
| <i>Xo</i> -Forward   | ATGACGAGGACAACGGTAGAT   |
| <i>Xo</i> -Reverse   | TCATACTTGGAGATCATCACGGT |
| <i>Sod1</i> -Forward | AACCAGTTGTGTTGTCAGGAC   |
| <i>Sod1</i> -Reverse | CCACCATGTTTCTTAGAGTGAGG |
| <i>Cat</i> -Forward  | AGCGACCAGATGAAGCAGTG    |
| <i>Cat</i> -Reverse  | TCCGCTCTCTGTCAAAGTGTG   |
| <i>Gpx1</i> -Forward | AGTCCACCGTGTATGCCTTCT   |
| <i>Gpx1</i> -Reverse | GAGACGCGACATTCTCAATGA   |
